# Supplementary material
Source: Elsevier journal article supplement (https://www.sciencedirect.com/science/article/pii/S0210569122001085)
Supplement: mmc1 [file S0210569122001085:mmc1.doc]

**Appendix A**

Lung-protective ventilation protocol

Although patient care was at the discretion of the doctor on charge, both ICUs adopted the same protective mechanical ventilation protocol. The initial ventilatory mode could be volume-controlled ventilation or pressure-controlled ventilation, adjusted to offer a tidal volume (VT) of 6 ml/kg predicted body weight (PBW). PBW was calculated using the equations: 1. female PBW = 45.5 + 0.91 x (height in cm – 152.4); 2. male PBW = 50 + 0.91 x (height in cm – 152.4). VT could be reduced to 4-5 ml/kg PBW to ensure plateau pressure ≤30 cmH2O and driving pressure ≤15 cmH2O. To keep the same minute ventilation recorded before reduction of VT, respiratory rate could be increased up to 35 breaths/min. Conversely, a VT up to 8 ml/kg PBW was allowed if the patient became distressed and attempted to take larger VT.

PEEP and FiO2 were adjusted according to the ARDSNet table to maintain SpO2 93%-96% (eTable 1).

**eTable 1. ARDS Net table of FiO2 and PEEP values**

| **FiO2** | .3 | .4 | .4 | .5 | .5 | .6 | .7 | .7 | .7 | .8 | .9 | .9 | .9 | 1 |
| --- | --- | --- | --- | --- | --- | --- | --- | --- | --- | --- | --- | --- | --- | --- |
| **PEEP,**  **mmHg** | 5 | 5 | 8 | 8 | 10 | 10 | 10 | 12 | 14 | 14 | 14 | 16 | 18 | 18-24 |

Patients with PaO2/FiO2 <150 mmHg, with PEEP >10 cmH2O were turned to prone position and kept in this position for 16-18 hours. The criteria for stopping prone treatment were: 1. Improvement in oxygenation (PaO2/FiO2 ≥150 mmHg, with PEEP ≤10 cmH2O, 4 hours after the end of the prone session); 2. Decrease in the PaO2/FiO2 >20% in prone position relative to the ratio in supine position; 3. Complications occurring during a prone session.

If prone positioning was contra-indicated or if it was ineffective in increasing PaO2/FiO2, a recruitment maneuver with incremental PEEP levels (up to 25 cm H2O), followed by a decremental PEEP titration according to the best respiratory-system static compliance, was performed.

The ventilator mode was switched to pressure support in patients who were awake enough to breathe with this mode. The pressure support level was lowered in 2 cm H2O if the patient remained comfortable, with a VT of 6 to 8 ml/kg PDW and a respiratory rate of 12 to 30/min. A patient was assumed to be ready for extubation if they presented PaO2/FiO2 >200 mmHg and a respiratory rate between 8 to 30/min with no signs of respiratory distress, for at least 30 minutes, while ventilated with a pressure support of 7 cm H2O, PEEP <= 8 cm H2O, FiO2 <=0.4, providing he/she was clinically stable. Patients ventilated for more than 14 days were considered for tracheostomy if they presented one of the following indications: MV expected to last at least 7 days more, Glasgow coma score lower than 8, inadequate swallow or cough reflex with retention of sputum. Weaning with a tracheostomy followed the same protocol described above.
